# Supplementary material
Source: PubMed Central journal article supplement (PMC6143416)
Supplement: NIHMS965418-supplement-10803_2018_3566_MOESM1_ESM.pdf [file NIHMS965418-supplement-10803_2018_3566_MOESM1_ESM.pdf]

Supplementary Table. Regions showing significant relationships between cortical thickness and SRS scores. Numbers represent parameter estimates for the main effects. The “Comparison” column lists significant findings for the SRS scores (SRS Total raw, SCI, or RRB). Where multiple comparisons are listed, parameter estimates for Total Raw score are provided in the table. Bold indicates significant effect after FDR correction.

#### ASD

| Region/gyrus          |    | Comparison        | Intercept      | SRS             | age              | SRS*age         | age2              | Average CT     | protocol        |
|-----------------------|----|-------------------|----------------|-----------------|------------------|-----------------|-------------------|----------------|-----------------|
| Frontal Lobe          |    |                   |                |                 |                  |                 |                   |                |                 |
| Frontal Pole          | RH | Total, RRB        | <b>3.21***</b> | <b>0.0017*</b>  | <b>0.014**</b>   | ---             | ---               | <b>1.85***</b> | <b>-0.34***</b> |
| Lateral Orbitofrontal | LH | RRB               | <b>3.00***</b> | 0.001           | 0.004            | <b>0.0005*</b>  | ---               | <b>1.45***</b> | -0.04*          |
| Medial Orbitofrontal  | LH | Total, RRB, SCI~  | <b>2.80***</b> | 0.0006          | 0.003            | <b>-0.0001*</b> | ---               | <b>1.22***</b> | <b>-0.10***</b> |
| Superior              | LH | Total, SCI+, RRB^ | <b>3.17***</b> | 0.0005*         | 0.0002           | 0.00007*        | -0.0002           | <b>1.08***</b> | <b>-0.12***</b> |
| Temporal              |    |                   |                |                 |                  |                 |                   |                |                 |
| Bank Superior Sulcus  | LH | RRB               | <b>2.76***</b> | -0.004*         | -0.001           | ---             | ---               | <b>0.83***</b> | 0.04            |
| Inferior              | LH | Total, SCI, RRB   | <b>3.14***</b> | <b>-0.001*</b>  | 0.005            | -0.0001         | ---               | <b>0.94***</b> | <b>-0.05*</b>   |
| Inferior              | RH | Total, SCI        | <b>3.19***</b> | -0.0003         | 0.001            | <b>-0.0001*</b> | 0.0002            | <b>0.99***</b> | ---             |
| Middle                | RH | Total, SCI        | <b>3.29***</b> | -0.0001         | 0.005            | -0.0001*        | -0.0002           | <b>0.95***</b> | <b>-0.06**</b>  |
| Temporal Pole         | RH | Total, SCI        | <b>3.81***</b> | 0.001*          | <b>0.018**</b>   | ---             | ---               | <b>1.39***</b> | <b>0.15***</b>  |
| Parietal              |    |                   |                |                 |                  |                 |                   |                |                 |
| Precuneus             | LH | RRB               | <b>2.64***</b> | -0.0001         | <b>-0.008***</b> | 0.0003*         | ---               | <b>0.85***</b> | <b>0.08***</b>  |
| Occipital             |    |                   |                |                 |                  |                 |                   |                |                 |
| Lateral               | RH | RRB               | <b>2.52***</b> | -0.0006         | -0.002           | <b>0.0005**</b> | ---               | <b>0.85***</b> | <b>0.08***</b>  |
| Lingual               | RH | RRB               | <b>2.17***</b> | 0.001           | <b>-0.011**</b>  | <b>0.0005*</b>  | 0.0002            | <b>0.60***</b> | <b>0.17***</b>  |
| Cingulate             |    |                   |                |                 |                  |                 |                   |                |                 |
| Caudal Anterior       | RH | Total, SCI        | <b>2.78***</b> | -0.001*         | -0.006           | ---             | <b>-0.0006*</b>   | <b>0.74***</b> | ---             |
| Isthmus               | LH | SCI               | <b>2.81***</b> | 0.0001          | 0.003            | 0.0001*         | <b>-0.0007***</b> | <b>0.77***</b> | <b>0.11***</b>  |
| Posterior             | RH | Total, SCI        | <b>2.76***</b> | <b>-0.001**</b> | -0.002           | ---             | <b>-0.0004*</b>   | <b>0.80***</b> | <b>0.10***</b>  |

#### TDC

| Region/gyrus      |    | Comparison      | Intercept      | SRS            | age             | SRS*age        | age2   | Average CT     | protocol        |
|-------------------|----|-----------------|----------------|----------------|-----------------|----------------|--------|----------------|-----------------|
| Frontal           |    |                 |                |                |                 |                |        |                |                 |
| Pars Triangularis | LH | Total           | <b>2.88***</b> | .002*          | 0.0002          | ---            | 0.0002 | <b>1.12***</b> | <b>-.22***</b>  |
| Pars Opercularis  | LH | RRB             | <b>2.98***</b> | 0.011*         | 0.0006          | -0.0009        | ---    | <b>0.79***</b> | <b>-0.11***</b> |
| Temporal          |    |                 |                |                |                 |                |        |                |                 |
| Entorhinal        | LH | RRB             | <b>3.30***</b> | -0.03          | 0.013           | 0.004*         | ---    | <b>1.69***</b> | <b>0.43***</b>  |
| Insula            | LH | Total, SCI+     | <b>3.38***</b> | -.002*         | -.005*          | ---            | ---    | <b>0.61***</b> | -0.03           |
| Inferior          | RH | SCI             | <b>3.18***</b> | 0.0001         | -0.003          | -.0003*        | ---    | <b>0.95***</b> | .04*            |
| Temporal Pole     | LH | Total, SCI, RRB | <b>3.53***</b> | -0.002         | 0.003           | <b>-.001**</b> | ---    | <b>1.13***</b> | <b>.34**</b>    |
| Parietal          |    |                 |                |                |                 |                |        |                |                 |
| Superior          | LH | SCI             | <b>2.45***</b> | -0.001         | -0.002          | <b>.0003*</b>  | ---    | <b>0.94***</b> | ---             |
| Occipital         |    |                 |                |                |                 |                |        |                |                 |
| Cuneus            | LH | RRB             | <b>1.98***</b> | <b>0.018**</b> | <b>-0.009**</b> | ---            | ---    | <b>0.47***</b> | <b>0.09***</b>  |

+: SCI main effect significant; ^: RRB by age significant; ~SCI\*age missed FDR correction
